# Supplementary material for: Selection and Validation of Appropriate Reference Genes for Quantitative Real-Time PCR Analysis of Gene Expression in Lycoris aurea
Source: Front Plant Sci. 2016 Apr 25;7:536. doi: 10.3389/fpls.2016.00536 (PMC4843812; doi:10.3389/fpls.2016.00536)
Supplement: Table S2 — Selected unigenes from the transcriptome data of Lycoris aurea. The unigenes with appropriate expression quantities and highly reliable annotation were selected to evaluate the stability of gene expression. [file Table2.XLS]

## Sheet: RNA-Seq
Table S2| Selected unigenes from the transcriptome data of Lycoris aurea.
Gene symbol	Gene ID	Length (bp)	Raw reads (CK)	Raw reads (MJ100)	FPKM (CK)	FPKM (MJ100)	Mean	SD	CV	Nr-ID	Nr-Score	Nr-Evalue	Nr-annotation	Nt-ID	Nt-Score	Nt-Evalue	Nt-annotation	Swissprot-ID	Swissprot-Score	Swissprot-Evalue	Swissprot-annotation	COG-Protein-or-Domain	COG-Score	COG-Evalue	COG-ID	COG-Function-Description	KO_id	KEGG-Evalue	KEGG-Score	KEGG-Gene	ko_definition	GO-BiologicalProcess	GO-MolecularFunction	Go-CellularComponent
YLS8	CL7523.Contig2_All	675	398	572	71.4362	105.697	88.5667	24.2263	0.273537	gi|224094081|ref|XP_002310072.1|	290.4	1e-77	predicted protein [Populus trichocarpa] >gi|225432821|ref|XP_002283622.1| PREDICTED: thioredoxin-like protein 4A [Vitis vinifera] >gi|255577696|ref|XP_002529724.1| mitosis protein dim1, putative [Ricinus communis] >gi|356532239|ref|XP_003534681.1| PREDICTED: DIM protein [Glycine max] >gi|356571707|ref|XP_003554015.1| PREDICTED: thioredoxin-like protein 4A-like [Glycine max] >gi|118484553|gb|ABK94…	gi|226498605|ref|NM_001155395.1|	391	1e-106	Zea mays LOC100282486 (pco104916), mRNA >gi|195622739|gb|EU961082.1| Zea mays clone 232698 mitosis protein dim1 mRNA, complete cds	--	--	--	--	ECU02g1270	77.4	2e-14	COG0526	Thiol-disulfide isomerase and thioredoxins	K12859	1e-78	290	gmx:100792141	U5 snRNP protein, DIM1 family	GO:0016049//cell growth;GO:0006623//protein targeting to vacuole;GO:0000902//cell morphogenesis;GO:0016197//endosomal transport;GO:0006944//cellular membrane fusion;GO:0007067//mitosis;GO:0007030//Golgi organization;GO:0007033//vacuole organization;GO:0048193//Golgi vesicle transport	GO:0003676//nucleic acid binding;GO:0003824//catalytic activity	GO:0005681//spliceosomal complex;GO:0005737//cytoplasm
α-TUB	CL544.Contig2_All	1705	3543	4631	251.759	338.783	295.271	61.5352	0.208402	gi|56481443|gb|AAV92352.1|	910.6	0	alpha tubulin 1 [Pseudotsuga menziesii var. menziesii] >gi|56481445|gb|AAV92353.1| alpha tubulin 1 [Pseudotsuga menziesii var. menziesii] >gi|56481447|gb|AAV92354.1| alpha tubulin 1 [Pseudotsuga menziesii var. menziesii] >gi|56481449|gb|AAV92355.1| alpha tubulin 1 [Pseudotsuga menziesii var. menziesii] >gi|56481451|gb|AAV92356.1| alpha tubulin 1 [Pseudotsuga menziesii var. menziesii] >gi|56481453…	gi|470103757|ref|XM_004288249.1|	1108	0	PREDICTED: Fragaria vesca subsp. vesca tubulin alpha-3 chain-like (LOC101301331), mRNA	sp|Q6VAF9|TBA4_GOSHI	902	0	Tubulin alpha-4 chain OS=Gossypium hirsutum PE=2 SV=1	SPBC800.05c	687	0	COG5023	Tubulin	K07374	0	909	vvi:100247081	tubulin alpha	GO:0051258//protein polymerization;GO:0006184//GTP catabolic process;GO:0007017//microtubule-based process	GO:0003924//GTPase activity;GO:0005200//structural constituent of cytoskeleton;GO:0005525//GTP binding	GO:0005874//microtubule;GO:0005737//cytoplasm
β-TUB	Unigene13345_All	1660	2000	1602	145.969	120.372	133.171	18.0997	0.135914	gi|223018283|gb|ACM78033.1|	870.2	0	beta-tubulin [Citrus maxima]	gi|242386894|emb|FP094147.1|	910	0	Phyllostachys edulis cDNA clone: bphylf038n05, full insert sequence	sp|Q41784|TBB7_MAIZE	866	0	Tubulin beta-7 chain OS=Zea mays GN=TUBB7 PE=2 SV=1	ECU03g0820i	707	0	COG5023	Tubulin	K07375	0	868	rcu:RCOM_1336530	tubulin beta	GO:0006184//GTP catabolic process;GO:0009826//unidimensional cell growth;GO:0051258//protein polymerization;GO:0009416//response to light stimulus;GO:0046686//response to cadmium ion;GO:0007018//microtubule-based movement	GO:0005525//GTP binding;GO:0003924//GTPase activity;GO:0005200//structural constituent of cytoskeleton	GO:0005773//vacuole;GO:0009507//chloroplast;GO:0005618//cell wall;GO:0005874//microtubule;GO:0005886//plasma membrane
PTBP1	CL6418.Contig1_All	1614	154	124	11.56	9.5827	10.5714	1.39816	0.13226	gi|225452859|ref|XP_002283748.1|	702.2	0	PREDICTED: polypyrimidine tract-binding protein homolog 1 isoform 1 [Vitis vinifera] >gi|296082938|emb|CBI22239.3| unnamed protein product [Vitis vinifera]	gi|359488933|ref|XM_002283712.2|	698	0	PREDICTED: Vitis vinifera polypyrimidine tract-binding protein homolog 1-like, transcript variant 1 (LOC100266445), mRNA	sp|Q9MAC5|PTBP1_ARATH	585	2e-167	Polypyrimidine tract-binding protein homolog 1 OS=Arabidopsis thaliana GN=PTB PE=2 SV=1	--	--	--	--	--	K14948	2e-37	155	pop:POPTR_714769	olypyrimidine tract-binding protein 2	GO:0043484//regulation of RNA splicing;GO:0006417//regulation of translation;GO:0009846//pollen germination	GO:0003676//nucleic acid binding;GO:0000166//nucleotide binding	GO:0000932//cytoplasmic mRNA processing body;GO:0005634//nucleus
PP2A	CL6570.Contig3_All	1475	486	413	39.8273	34.9245	37.3759	3.46685	0.0927563	gi|413942733|gb|AFW75382.1|	21.2	4e-06	hypothetical protein ZEAMMB73_324274 [Zea mays]	gi|359490944|ref|XM_002276144.2|	672	0	PREDICTED: Vitis vinifera serine/threonine-protein phosphatase 2A 65 kDa regulatory subunit A beta isoform-like (LOC100266203), mRNA	sp|Q38950|2AAB_ARATH	679	0	Serine/threonine-protein phosphatase 2A 65 kDa regulatory subunit A beta isoform OS=Arabidopsis thaliana GN=PP2AA2 PE=1 SV=2	--	--	--	--	--	K03456	0	692	zma:732740	protein phosphatase 2 (formerly 2A), regulatory subunit A	GO:0009789//positive regulation of abscisic acid mediated signaling pathway;GO:0016049//cell growth;GO:0042325//regulation of phosphorylation;GO:0009926//auxin polar transport;GO:0000902//cell morphogenesis;GO:0010119//regulation of stomatal movement;GO:0048193//Golgi vesicle transport;GO:0009723//response to ethylene stimulus;GO:0046686//response to cadmium ion	GO:0008601//protein phosphatase type 2A regulator activity	GO:0005829//cytosol;GO:0005618//cell wall;GO:0005886//plasma membrane
GAPDH	CL7040.Contig2_All	1429	13101	11209	1110.74	978.378	1044.56	93.5924	0.0896	gi|312192239|gb|ADQ43814.1|	622.1	7e-177	glyceraldehyde-3-phosphate dehydrogenase [Ananas comosus]	gi|399525591|gb|HQ403589.1|	1842	0	Lycoris longituba GAPDH mRNA, partial cds	sp|Q7FAH2|G3PC2_ORYSJ	622	2e-178	Glyceraldehyde-3-phosphate dehydrogenase 2, cytosolic OS=Oryza sativa subsp. japonica GN=GAPC2 PE=1 SV=1	SPBC32F12.11	458	1e-128	COG0057	Glyceraldehyde-3-phosphate dehydrogenase/erythrose-4-phosphate dehydrogenase	K00134	6e-178	622	osa:4336216	glyceraldehyde 3-phosphate dehydrogenase [EC:1.2.1.12]	GO:0048316//seed development;GO:0055114//oxidation-reduction process;GO:0009744//response to sucrose stimulus;GO:0009651//response to salt stress;GO:0042742//defense response to bacterium;GO:0009408//response to heat;GO:0006096//glycolysis;GO:0046686//response to cadmium ion;GO:0042542//response to hydrogen peroxide	GO:0051287//NAD binding;GO:0005507//copper ion binding;GO:0008270//zinc ion binding;GO:0004365//glyceraldehyde-3-phosphate dehydrogenase (NAD+) (phosphorylating) activity;GO:0050661//NADP binding	GO:0005618//cell wall;GO:0005730//nucleolus;GO:0005740//mitochondrial envelope;GO:0009507//chloroplast;GO:0005886//plasma membrane;GO:0048046//apoplast
EXP2	CL670.Contig8_All	1505	21	18	1.6905	1.49184	1.59117	0.140474	0.0882834	gi|255538360|ref|XP_002510245.1|	377.5	3e-103	conserved hypothetical protein [Ricinus communis] >gi|223550946|gb|EEF52432.1| conserved hypothetical protein [Ricinus communis]	gi|158508738|gb|AC213012.1|	230	3e-57	Populus trichocarpa clone POP011-N24, complete sequence	--	--	--	--	--	--	--	--	--	--	--	--	--	--	-	-	GO:0005739//mitochondrion;GO:0005794//Golgi apparatus
ACT	CL1144.Contig2_All	1216	4732	4063	471.466	416.759	444.112	38.6836	0.0871031	gi|399525600|gb|AFP44112.1|	747.7	0	actin [Lycoris longituba]	gi|399525599|gb|HQ403593.1|	1703	0	Lycoris longituba actin mRNA, complete cds	sp|Q10AZ4|ACT3_ORYSJ	739	0	Actin-3 OS=Oryza sativa subsp. japonica GN=ACT3 PE=2 SV=1	SPBC32H8.12c	675	0	COG5277	Actin and related proteins	K05692	0	742	bdi:100834364	actin beta/gamma 1	GO:0048767//root hair elongation;GO:0009845//seed germination;GO:0009416//response to light stimulus;GO:0009611//response to wounding;GO:0051301//cell division;GO:0009733//response to auxin stimulus	GO:0005524//ATP binding	GO:0005618//cell wall;GO:0005856//cytoskeleton;GO:0005739//mitochondrion;GO:0005730//nucleolus;GO:0005886//plasma membrane
CYP2	CL8032.Contig1_All	1511	178	153	14.2723	12.6299	13.4511	1.16138	0.0863409	gi|462419076|gb|EMJ23339.1|	518.1	1e-145	hypothetical protein PRUPE_ppa004669mg [Prunus persica]	gi|359476251|ref|XM_002279892.2|	141	2e-30	PREDICTED: Vitis vinifera peptidyl-prolyl cis-trans isomerase CWC27 homolog, transcript variant 1 (LOC100267905), mRNA	sp|Q9FJX0|PPIL2_ARATH	73.9	2e-13	Peptidyl-prolyl cis-trans isomerase-like 2 OS=Arabidopsis thaliana GN=PUB49 PE=2 SV=1	SPBC16H5.05c	103	6e-22	COG0652	Peptidyl-prolyl cis-trans isomerase (rotamase) - cyclophilin family	K12737	6e-143	505	rcu:RCOM_0706290	peptidyl-prolyl cis-trans isomerase SDCCAG10 [EC:5.2.1.8]	GO:0034976//response to endoplasmic reticulum stress;GO:0006623//protein targeting to vacuole;GO:0006457//protein folding;GO:0009408//response to heat;GO:0009644//response to high light intensity;GO:0042542//response to hydrogen peroxide	GO:0003755//peptidyl-prolyl cis-trans isomerase activity	GO:0009506//plasmodesma;GO:0005634//nucleus
EXP1	CL7794.Contig1_All	1791	138	151	9.33514	10.5161	9.92562	0.835066	0.0841324	gi|296089545|emb|CBI39364.3|	656.4	0	unnamed protein product [Vitis vinifera]	gi|359493497|ref|XM_003634568.1|	400	1e-108	PREDICTED: Vitis vinifera uncharacterized LOC100852521 (LOC100852521), mRNA	--	--	--	--	--	--	--	--	--	--	--	--	--	--	GO:0009165//nucleotide biosynthetic process	-	GO:0005634//nucleus
EF1-α	CL3597.Contig3_All	1713	3858	3416	272.863	248.732	260.797	17.0626	0.0654247	gi|462400841|gb|EMJ06398.1|	889.8	0	PREDICTED: elongation factor 1-alpha-like [Cucumis sativus] >gi|449505290|ref|XP_004162426.1| PREDICTED: elongation factor 1-alpha-like [Cucumis sativus]	gi|399525595|gb|HQ403591.1|	1580	0	Lycoris longituba elongation factor 1-alpha mRNA, complete cds	sp|O64937|EF1A_ORYSJ	881	0
UBC	CL5627.Contig8_All	1091	1412	1501	156.801	171.604	164.203	10.4674	0.063747	gi|399525604|gb|AFP44114.1|	313.5	3e-84	ubiquitin-conjugating enzyme [Lycoris longituba]	gi|399525603|gb|HQ403595.1|	914	0	Lycoris longituba ubiquitin-conjugating enzyme mRNA, complete cds	sp|P35133|UBC10_ARATH	305	4e-83	Ubiquitin-conjugating enzyme E2 10 OS=Arabidopsis thaliana GN=UBC10 PE=1 SV=1	YBR082c	261	2e-69	COG5078	Ubiquitin-protein ligase	K06689	7e-85	312	pop:POPTR_586577	ubiquitin-conjugating enzyme E2 D/E [EC:6.3.2.19]	-	GO:0016881//acid-amino acid ligase activity	-
CYP1	CL6321.Contig1_All	861	1094	1145	153.941	165.872	159.906	8.43702	0.0527622	gi|399525614|gb|AFP44118.1|	354	1e-96	cyclophilin [Lycoris longituba]	gi|399525613|gb|HQ403601.1|	706	0	Lycoris longituba cyclophilin mRNA, complete cds	sp|Q39613|CYPH_CATRO	322	2e-88	Peptidyl-prolyl cis-trans isomerase OS=Catharanthus roseus GN=PCKR1 PE=2 SV=1	slr1251	256	3e-68	COG0652	Peptidyl-prolyl cis-trans isomerase (rotamase) - cyclophilin family	K01802	2e-86	317	ath:AT2G21130	peptidylprolyl isomerase [EC:5.2.1.8]	GO:0006457//protein folding;GO:0046686//response to cadmium ion;GO:0000413//protein peptidyl-prolyl isomerization	GO:0003755//peptidyl-prolyl cis-trans isomerase activity	GO:0005886//plasma membrane;GO:0048046//apoplast
TIP41	Unigene3100_All	1119	276	265	29.8826	29.5384	29.7105	0.243386	0.00819192	gi|321437425|gb|ADW83723.1|	449.9	3e-125	TIP4I-like family protein [Musa acuminata AAA Group]	gi|321437424|gb|HQ853250.1|	236	4e-59	Musa acuminata AAA Group TIP4I-like family protein (TIP4I) mRNA, complete cds	--	--	--	--	--	--	--	--	--	--	--	--	--	--	-	-	GO:0005829//cytosol
FPKM: fragments per kilobase of exon model per million mapped reads
SD: standard deviation
CV: coefficient of variation
